# Supplementary material for: Memristor networks for real-time neural activity analysis
Source: PubMed Central journal article supplement (PMC7228921; doi:10.1038/s41467-020-16261-1), 2020-05-15
Supplement: 41467_2020_16261_MOESM2_ESM.pdf [file 41467_2020_16261_MOESM2_ESM.pdf]

## Description of Additional Supplementary Files

File name: Supplementary movie 1

Description: Real-time neural firing pattern recognition
